# Supplementary material for: Ballistic electrolyte ion transport with undisturbed pathways for ultrahigh-rate electrochemical energy storage devices
Source: Royal Society of Chemistry journal article supplement (doi:10.1039/d3ee03819j), 2024-01-01
Supplement: d3ee03819j1.pdf [file d3ee03819j1.pdf]

## Supplementary information

### Ballistic Electrolyte Ions Transport with Undisturbed Pathways for Ultrahigh-Rate Electrochemical Energy Storage Devices

Situo Cheng<sup>1#</sup>, Zhen Cao<sup>2#</sup>, Yupeng Liu<sup>1</sup>, Junli Zhang<sup>1</sup>, Luigi Cavallo<sup>2</sup>, Erqing Xie<sup>1</sup>,  
and Jiecai Fu<sup>1\*</sup>

<sup>1</sup>Key Laboratory for Magnetism and Magnetic Materials of the Ministry of Education,  
School of Physical Science and Technology, Lanzhou University, Lanzhou 730000, P.  
R. China

<sup>2</sup>KAUST Catalysis Center, King Abdullah University of Science and Technology  
(KAUST), Thuwal 23955-6900, Saudi Arabia

#S.C. and Z.C. contributed equally.

\*Corresponding authors

E-mail address: [fujc@lzu.edu.cn](mailto:fujc@lzu.edu.cn) (Jiecai Fu).

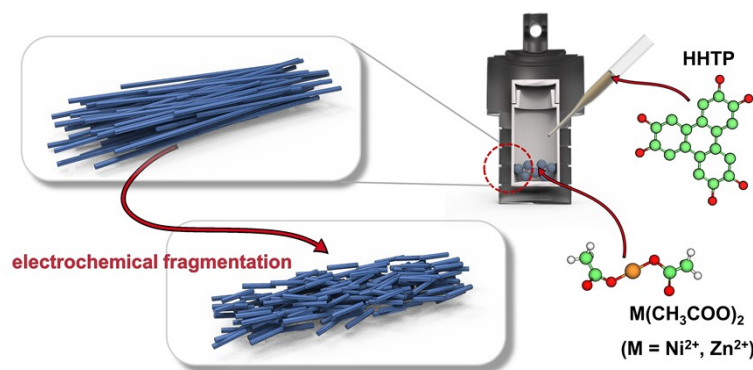

**Fig. S1** Schematic diagram of Zn/Ni-CAT synthesis and electrochemical fragmentation process of as-synthesized Zn-CAT.

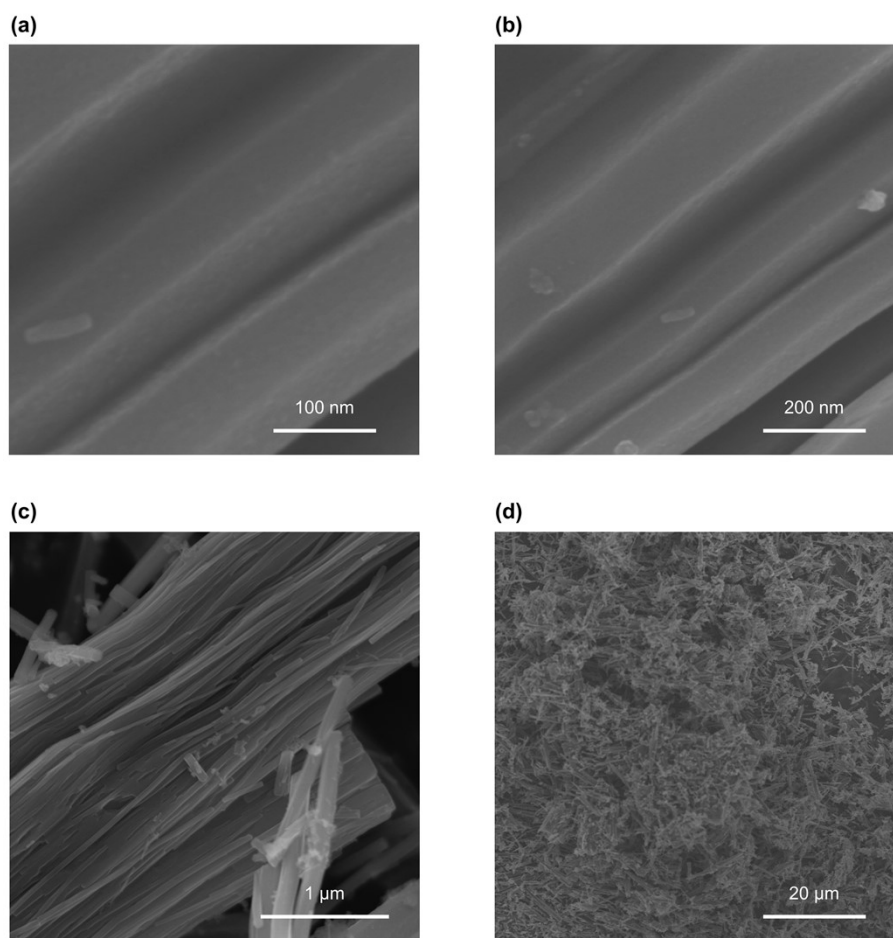

**Fig. S2** SEM images of the pristine Zn-CAT.

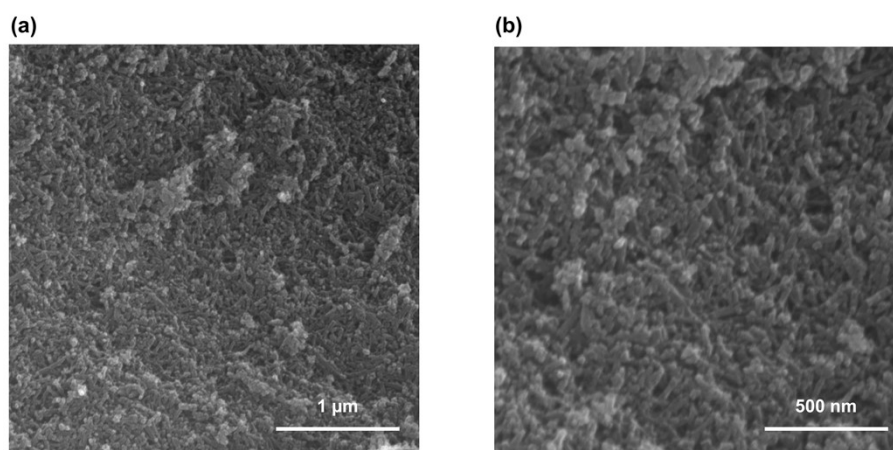

**Fig. S3** SEM images of the Ni-CAT.

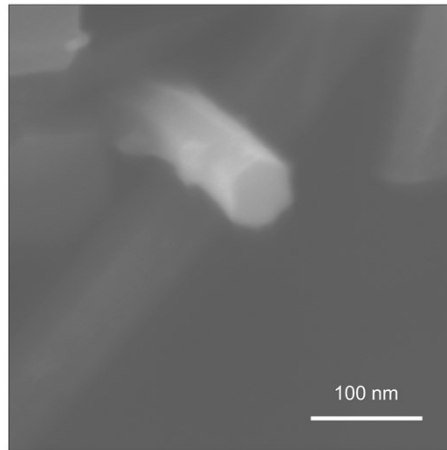

**Fig. S4** HR-SEM images of the Ni-CAT.

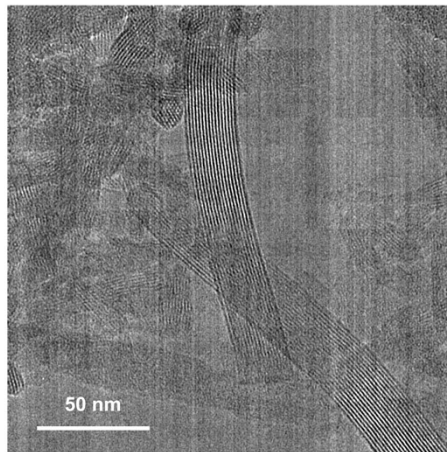

**Fig. S5** HR-TEM image of the Ni-CAT.

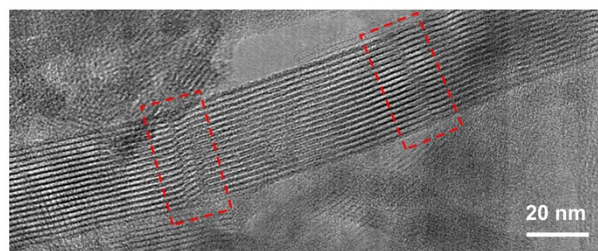

**Fig. S6** HR-TEM image of the Ni-CAT.

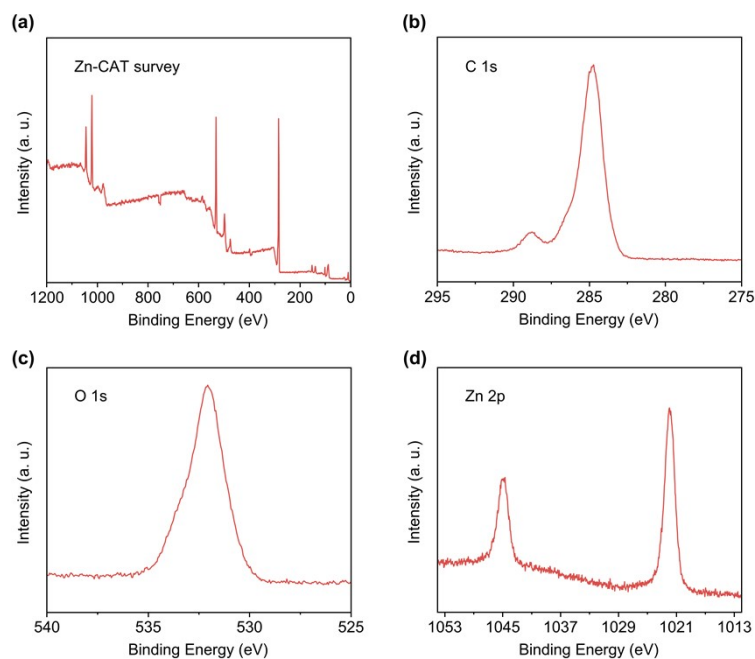

**Fig. S7** XPS spectra of Zn-CAT. (a) Zn-CAT survey and the corresponding (b) C 1s, (c) O 1s and (d) Zn 2p region.

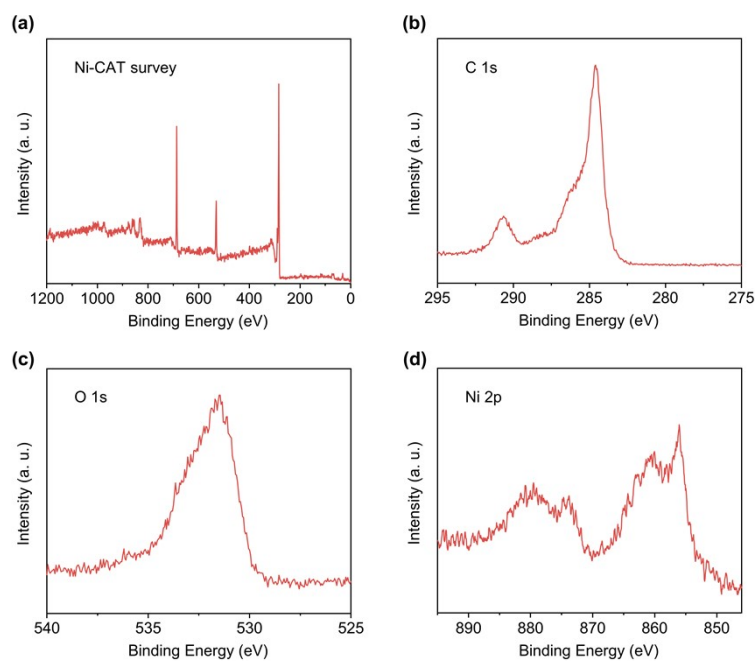

**Fig. S8** XPS spectra of Ni-CAT. (a) Ni-CAT survey and the corresponding (b) C 1s, (c) O 1s and (d) Ni 2p region. Ni 2p<sub>3/2</sub> peak has a binding energy of 856 eV, indicating the presence of Ni (II) in Ni-CAT.

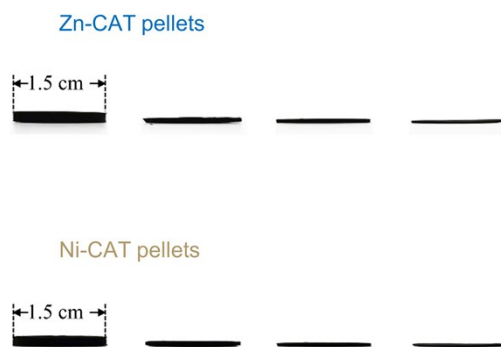

**Fig. S9** Optic images of Zn/Ni-CAT pellets. The diameter of the pellets is 1.50 cm.

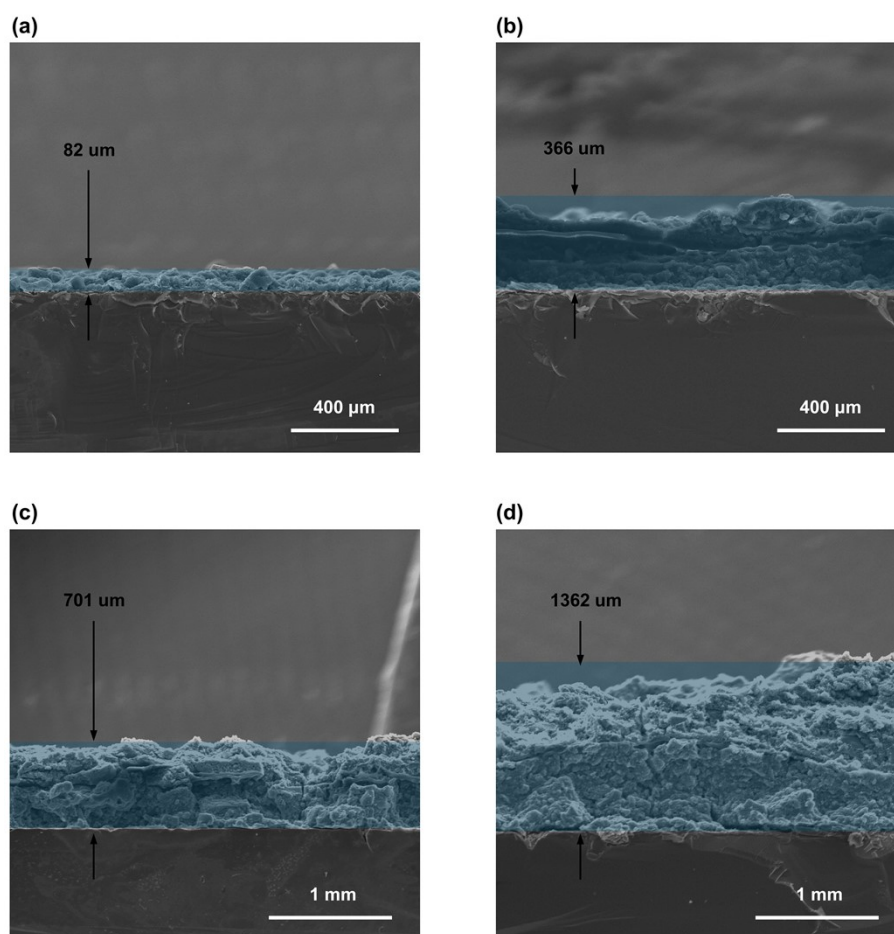

**Fig. S10** SEM images of the Zn-CAT pellets. Pellets (diameter: 1.5 cm) with thicknesses of (a) 82  $\mu\text{m}$ , (b) 366  $\mu\text{m}$ , (c) 701  $\mu\text{m}$ , and (d) 1362  $\mu\text{m}$  were prepared. The measured weight for each pellet is 9.05 mg, 42.74 mg, 85.84 mg, and 172.74 mg. The calculated density for each pellet is 0.620  $\text{g cm}^{-3}$ , 0.660  $\text{g cm}^{-3}$ , 0.695  $\text{g cm}^{-3}$ , and 0.720  $\text{g cm}^{-3}$ .

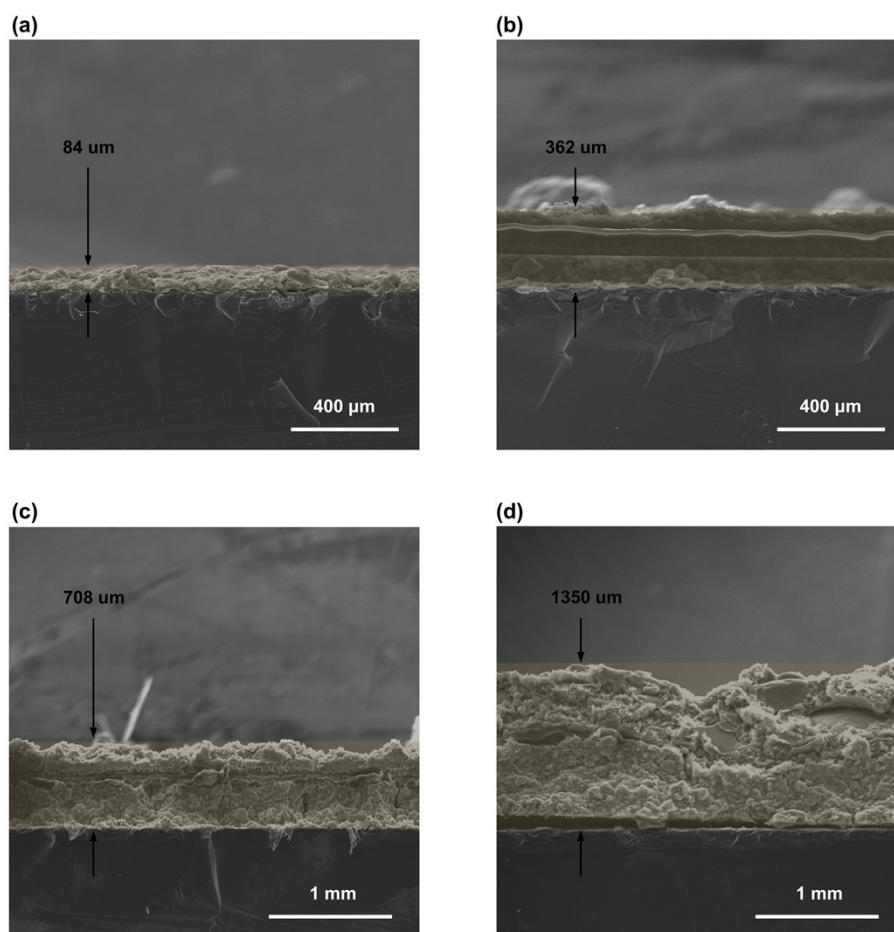

**Fig. S11** SEM images of the Ni-CAT pellets. Pellets (diameter: 1.5 cm) with thicknesses of (a) 84  $\mu\text{m}$ , (b) 362  $\mu\text{m}$ , (c) 708  $\mu\text{m}$ , and (d) 1350  $\mu\text{m}$  were prepared. The measured weight for each pellet is 8.65 mg, 43.10 mg, 88.49 mg, and 173.62 mg. The calculated density for each pellet is 0.585  $\text{g cm}^{-3}$ , 0.675  $\text{g cm}^{-3}$ , 0.710  $\text{g cm}^{-3}$ , and 0.730  $\text{g cm}^{-3}$ .

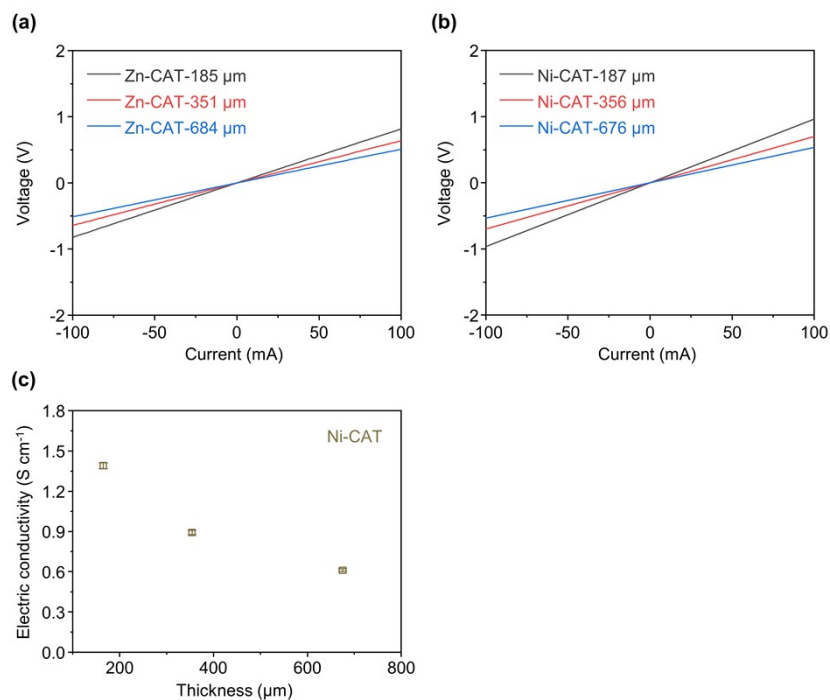

**Fig. S12** Electrical conductivity measurement of Zn-CAT and Ni-CAT samples in pellets. Voltage-current curves of (a) Zn-CAT and (b) Ni-CAT, (c) calculated conductivity of Ni-CAT.

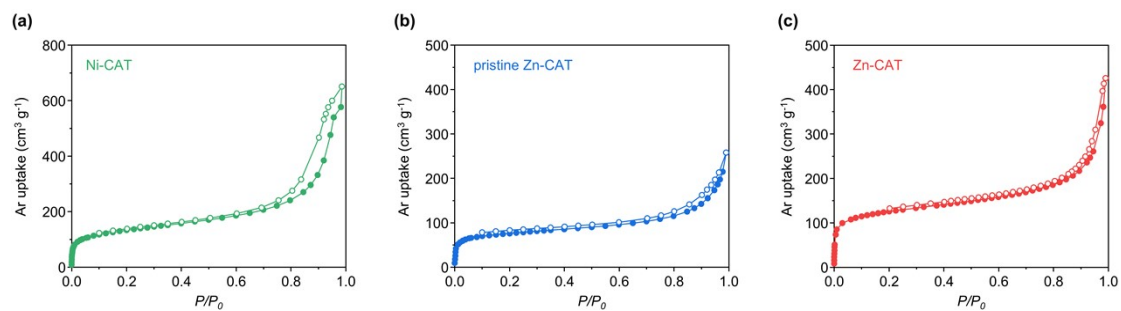

**Fig. S13** Argon adsorption isotherms measured at 87 K. Adsorption and desorption points are represented by filled and empty circles, respectively. (a) Ni-CAT, (b) pristine Zn-CAT, (c) Zn-CAT.



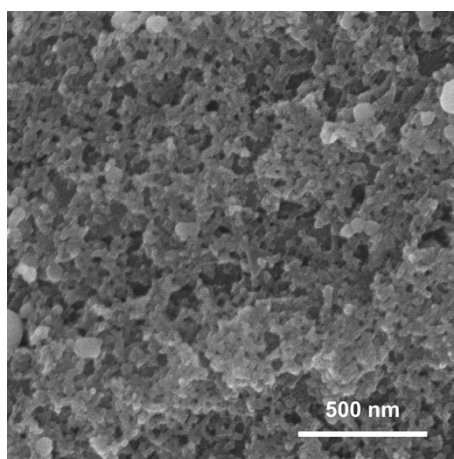

**Fig. S14** SEM images of the Ni-CAT after 100 cycles.

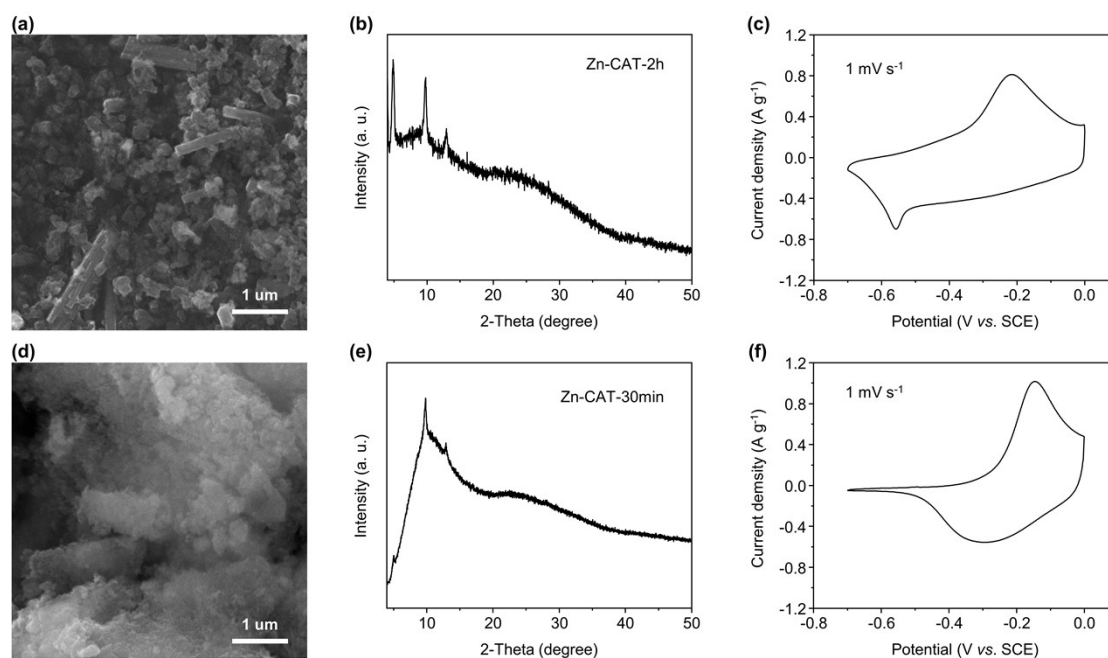

**Fig. S15** (a) and (d), SEM images of Zn-CAT-1h and Zn-CAT-30min. (b) and (e), XRD patterns of Zn-CAT-1h and Zn-CAT-30min; (c) and (f) CV profiles collected with Zn-CAT-1h and Zn-CAT-30min.

To further validate this conclusion, we have obtained the Zn-CAT particles with different particle sizes by controlling the hydrothermal time of the Zn-CAT. As expected, the reduction peaks at high potentials gradually decreased with the decrease of the Zn-CAT particle size. However, low synthesis time may also lead to lower



sample crystallinity, which will greatly affect the electrochemical performance of the Zn-CAT electrode ground, as revealed in Fig. S15.

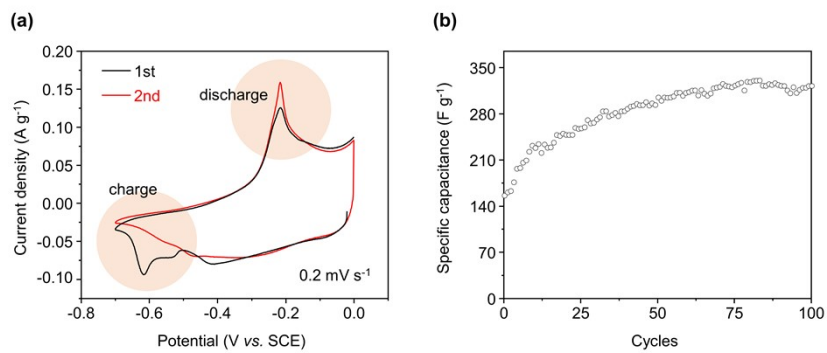

**Fig. S16** The CV curves of the pristine Zn-CAT at 0.2 mV s<sup>-1</sup>.

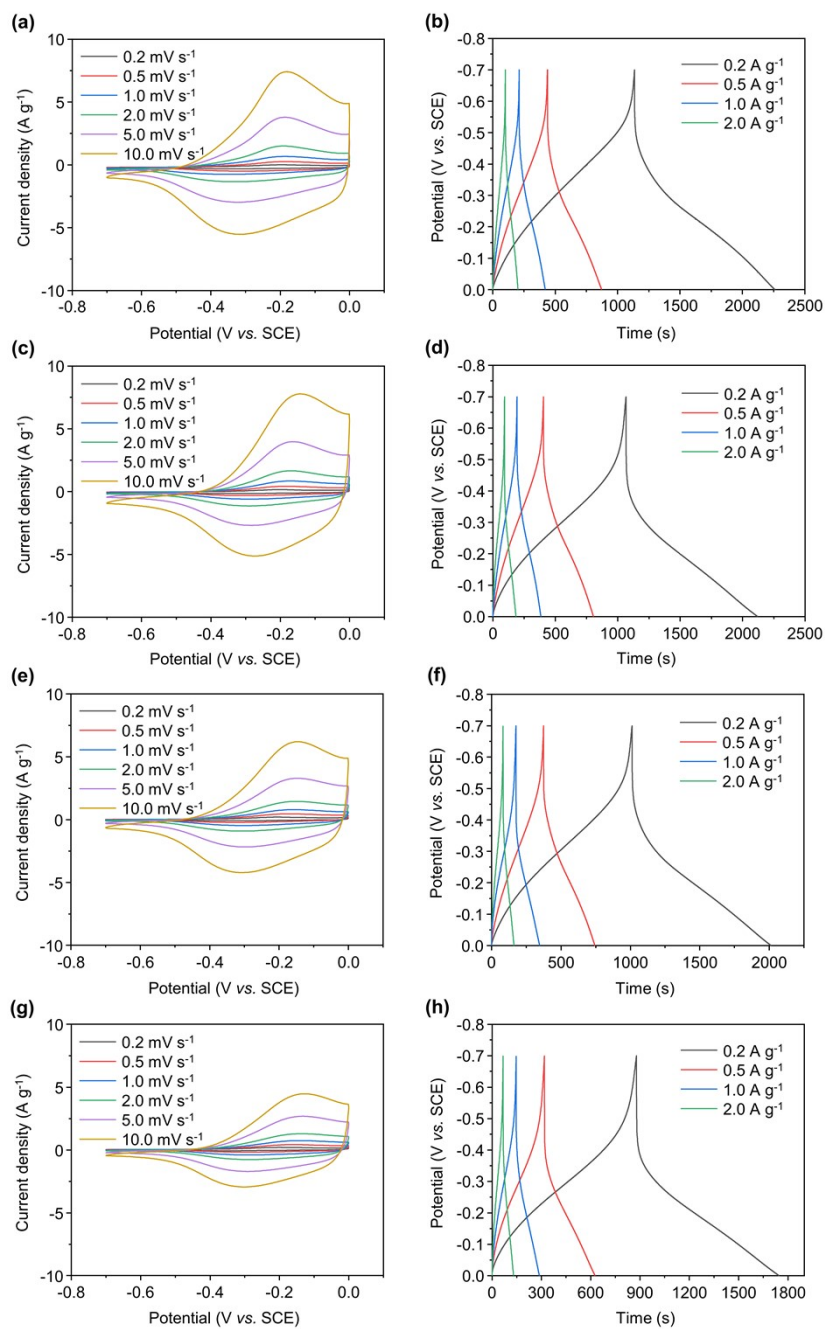

**Fig. S17** Electrochemical performance of Zn-CAT pellet in 1 M Na<sub>2</sub>SO<sub>4</sub>. Cyclic voltammety profiles collected with different electrode pellets of (a) 5.1 mg cm<sup>-2</sup>, (c) 24.2 mg cm<sup>-2</sup>, (e) 48.6 mg cm<sup>-2</sup>, and (g) 97.8 mg cm<sup>-2</sup> at different scan rates from 0.2 to 10 mVs<sup>-1</sup>. Galvanostatic charge discharge profiles were collected with different electrode pellets of (b) 5.1 mg cm<sup>-2</sup>, (d) 24.2 mg cm<sup>-2</sup>, (f) 48.6 mg cm<sup>-2</sup>, and (h) 97.8 mg cm<sup>-2</sup> at different current densities from 0.2 to 2.0 A g<sup>-1</sup>.

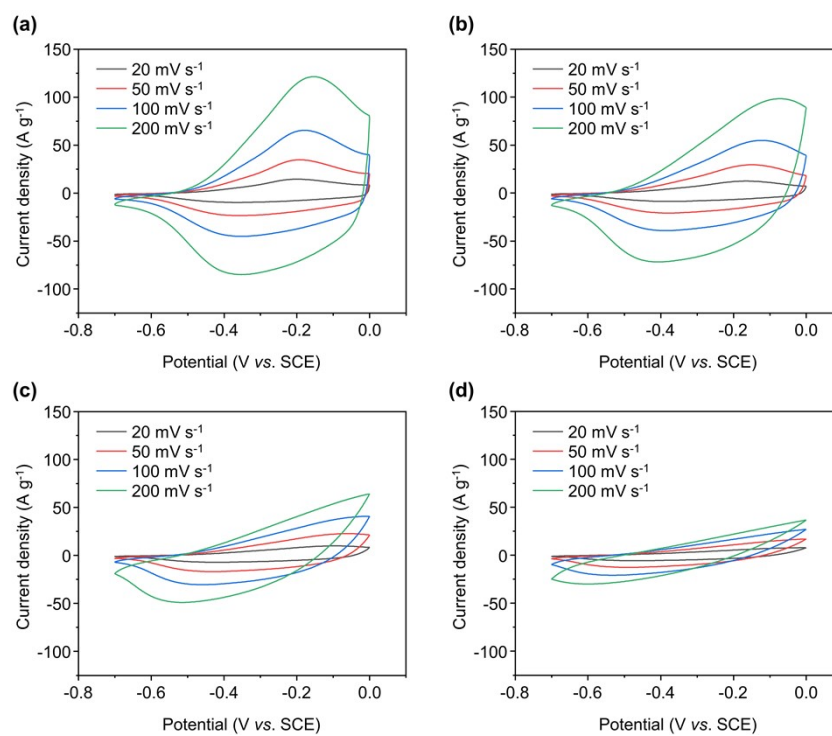

**Fig. S18** Electrochemical performance of Zn-CAT pellet in 1 M Na<sub>2</sub>SO<sub>4</sub> Cyclic voltammety profiles collected with different electrode pellets of (a) 5.2 mg cm<sup>-2</sup>, (b) 24.7 mg cm<sup>-2</sup>, (c) 49.4 mg cm<sup>-2</sup>, and (d) 97.4 mg cm<sup>-2</sup> at different scan rates from 20 to 200 mVs<sup>-1</sup>.

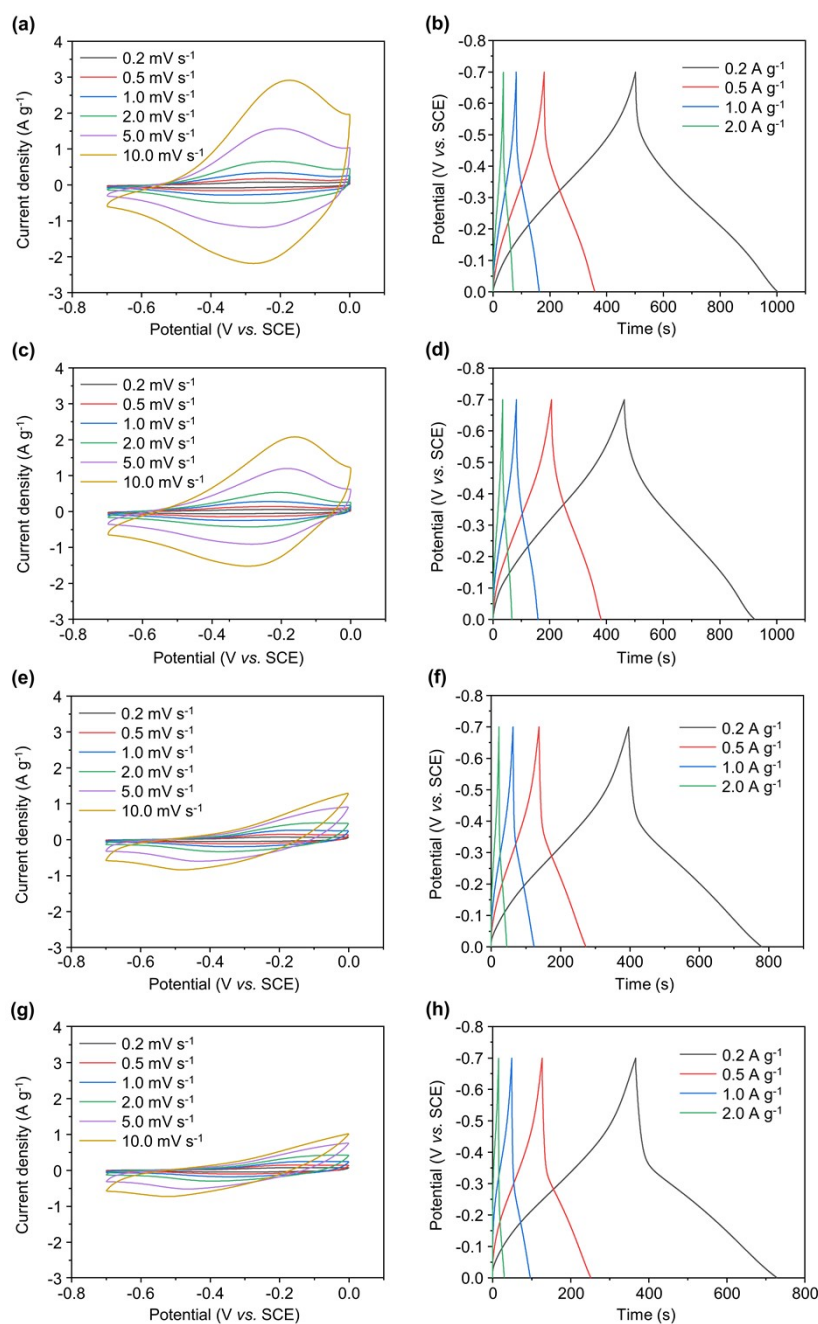

**Fig. S19** Electrochemical performance of Ni-CAT pellet in 1 M  $\text{Na}_2\text{SO}_4$ . Cyclic voltammety profiles collected with different electrode pellets of (a)  $4.9 \text{ mg cm}^{-2}$ , (c)  $24.4 \text{ mg cm}^{-2}$ , (e)  $50.1 \text{ mg cm}^{-2}$ , and (g)  $98.3 \text{ mg cm}^{-2}$  at different scan rates from 0.2 to  $10 \text{ mVs}^{-1}$ . Galvanostatic charge-discharge profiles were collected with different electrode pellets of (b)  $4.9 \text{ mg cm}^{-2}$ , (d)  $24.4 \text{ mg cm}^{-2}$ , (f)  $50.1 \text{ mg cm}^{-2}$ , and (h)  $98.3 \text{ mg cm}^{-2}$  at different current densities from 0.2 to  $2.0 \text{ A g}^{-1}$ . With the increase of Ni-

CAT pellet thickness, the redox peaks of CV curves show a certain degree of shift, which is influenced by the kinetics.

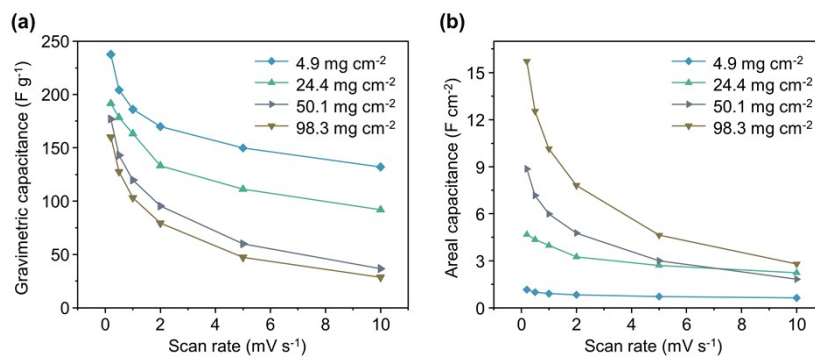

**Fig. S20** Rate performance of Ni-CAT electrodes with difference areal densities. (a) Gravimetric rate performance for Ni-CAT pellet electrodes with different areal densities of 4.9, 24.4, 50.1 and 98.3 mg cm<sup>-2</sup>. (b) Areal rate performance for the Ni-CAT pellet electrodes with different areal densities of 4.9, 24.4, 50.1 and 98.3 mg cm<sup>-2</sup>.

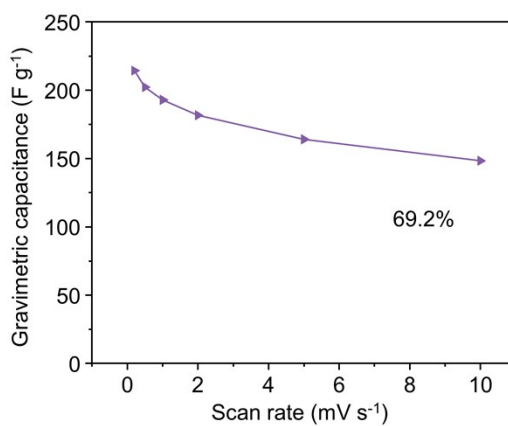

**Fig. S21** Rate performance of pristine Zn-CAT.

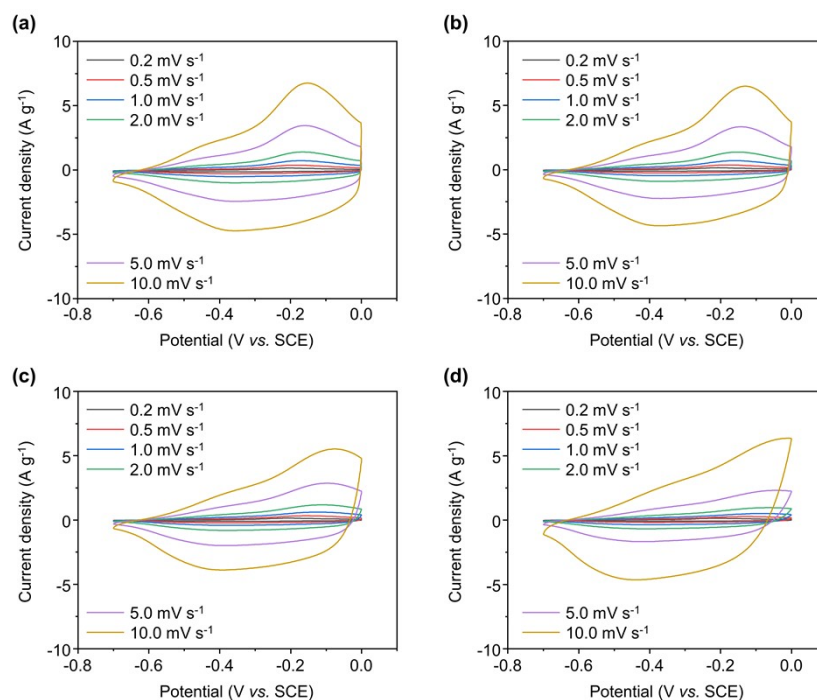

**Fig. S22** Electrochemical performance of Zn-CAT pellet in 2 M NaOTf. Cyclic voltammograms profiles collected with different electrode pellets of (a) 5.2 mg cm<sup>-2</sup>, (b) 24.7 mg cm<sup>-2</sup>, (c) 49.4 mg cm<sup>-2</sup>, and (d) 97.4 mg cm<sup>-2</sup> at different scan rates from 0.2 to 10 mVs<sup>-1</sup>.

**Table S1.** Rate performance of reported MOF-based electrode materials.

| MOF-based electrode materials            | Rate performance                            | Ref.     |
|------------------------------------------|---------------------------------------------|----------|
| Zn-CAT                                   | 83.3% (from 0.2 to 10 mV s <sup>-1</sup> )  | Our work |
| Cu-HATN                                  | 45.1% (from 0.15 to 1.5 A g <sup>-1</sup> ) | 1        |
| Ni <sub>2</sub> [CuPc(NH) <sub>8</sub> ] | 43.8% (from 0.5 to 20 A g <sup>-1</sup> )   | 2        |
| Ni-HAB                                   | 28.3% (from 0.2 to 100 mV s <sup>-1</sup> ) | 3        |
| Cu-THQ                                   | 24.0% (from 0.05 to 1.0 A g <sup>-1</sup> ) | 4        |
| HATN-SCu                                 | 30.2% (from 0.1 to 5.0 A g <sup>-1</sup> )  | 5        |
| Cu-DBC                                   | 54.6% (from 0.2 to 10 A g <sup>-1</sup> )   | 6        |

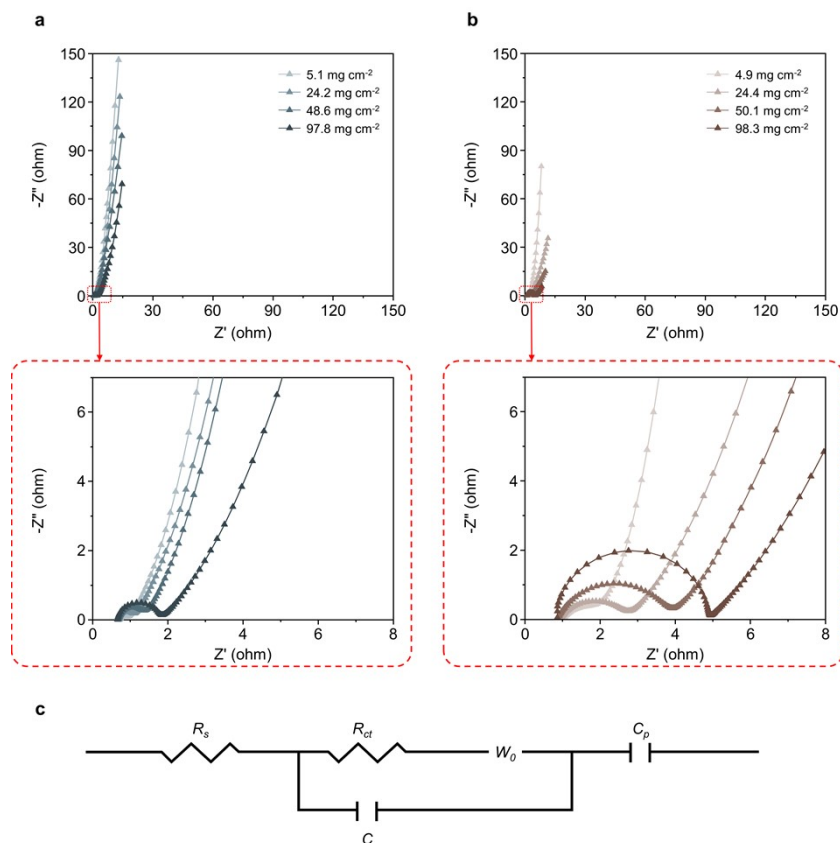

**Fig. S23** Nyquist plots of Zn/Ni-CAT pellets electrode with different areal densities. Nyquist plots of (a) Zn-CAT pellets electrode with difference areal density (5.1, 24.2, 48.6 and 98.3  $\text{mg cm}^{-2}$ ), (b) Ni-CAT pellets electrode with difference areal density (4.9, 24.4, 50.1 and 97.8  $\text{mg cm}^{-2}$ ). (c) Equivalent circuit of Zn/Ni-CAT pellets electrodes.  $R_s$  is the equivalent ohmic resistance,  $C$  is electrical double-layer capacitance,  $W_0$  is the finite-length Warburg diffusion element,  $R_{ct}$  is charge transfer resistance, and  $C_p$  is the pseudocapacitance.



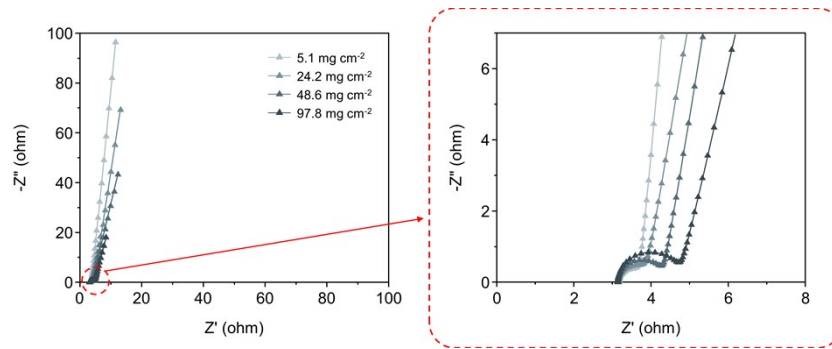

**Fig. S24** Nyquist plots of Zn-CAT//MnO<sub>2</sub> ASC with different areal densities.

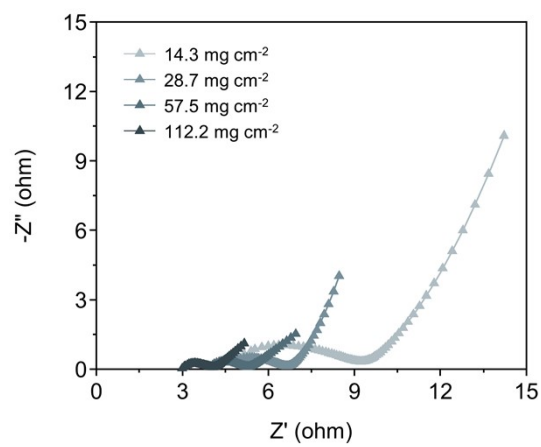

**Fig. S25** Nyquist plots of AC-BC electrodes with different areal densities.

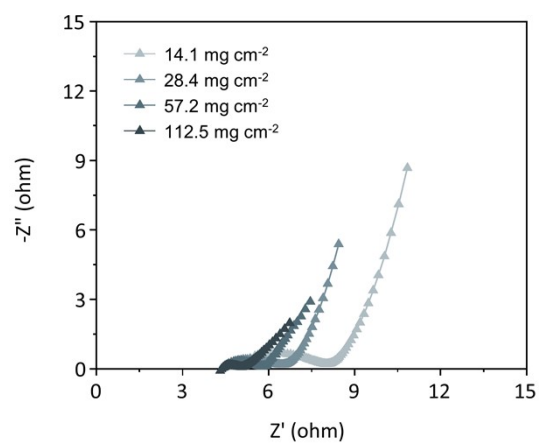

**Fig. S26** Nyquist plots of YP-80F electrodes with different areal densities.

**Table S2.** Internal resistance ( $R_s$ ) and charge-transfer resistance ( $R_{ct}$ ) calculated from fitted EIS of AC-BC electrode and YP-80F electrode for different weight loadings in 1 M  $\text{Na}_2\text{SO}_4$ .

| Different areal density | AC-BC( $R_s$ ) | AC-BC( $R_{ct}$ ) | YP-80F( $R_s$ ) | YP-80F( $R_{ct}$ ) |
|-------------------------|----------------|-------------------|-----------------|--------------------|
| ~14 mg                  | 3.000 $\Omega$ | 5.206 $\Omega$    | 5.177 $\Omega$  | 3.471 $\Omega$     |
| ~28 mg                  | 3.970 $\Omega$ | 2.545 $\Omega$    | 4.595 $\Omega$  | 2.333 $\Omega$     |
| ~56 mg                  | 4.119 $\Omega$ | 1.476 $\Omega$    | 4.470 $\Omega$  | 1.465 $\Omega$     |
| ~112 mg                 | 4.661 $\Omega$ | 1.160 $\Omega$    | 4.316 $\Omega$  | 0.750 $\Omega$     |

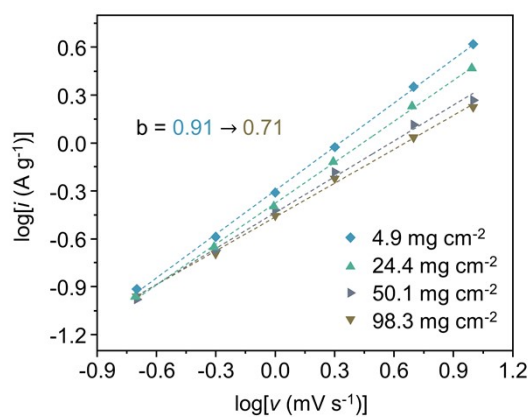

**Fig. S27** Plot of the logarithm of Ni-CAT pellet electrode currents ( $i$ ) versus the logarithm of scan rates ( $\nu$ ) for the different areal densities of 4.9, 24.4, 50.1 and 98.3  $\text{mg cm}^{-2}$ . The  $b$ -value is determined from the slope of the plots.

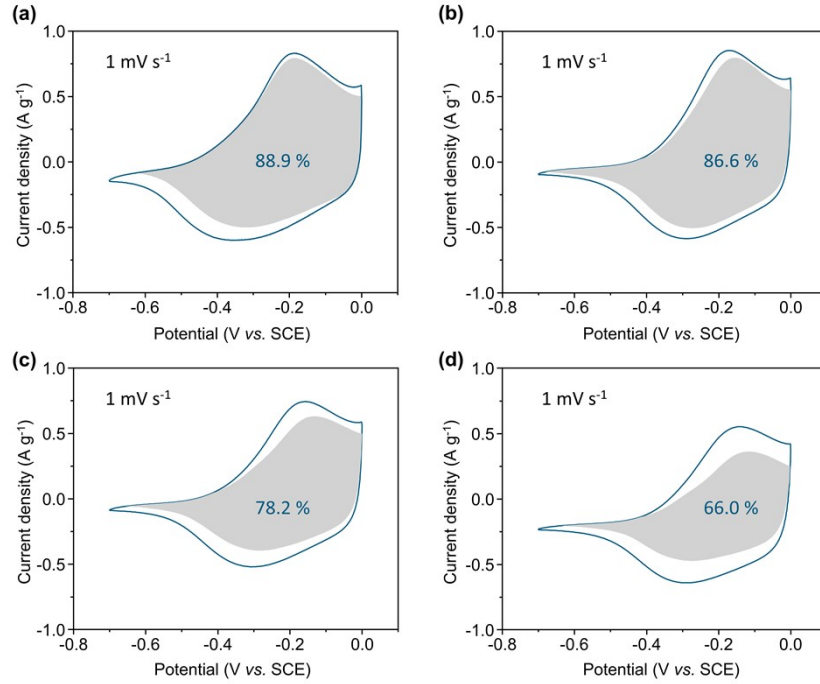

**Fig. S28** Capacitive and diffusion currents contributed to the charge-storage of Zn-CAT electrode at 1 mV s<sup>-1</sup> with different areal densities of 5.1, 24.2, 48.6 and 98.3 mg cm<sup>-2</sup>. Two separate mechanisms, surface-controlled process ( $k_1v$ , including fast-response capacitive effect) and diffusion-controlled process ( $k_2v^{1/2}$ ), contribute to the current response in CV curves at fixed potential according to the following equation:  $i=k_1v+k_2v^{1/2}$ , where  $i$  is the current,  $v$  is the scan rate. The fraction of current arising from two mechanisms at fixed potential can be distinguished by determining  $k_1$  and  $k_2$  values quantitatively.

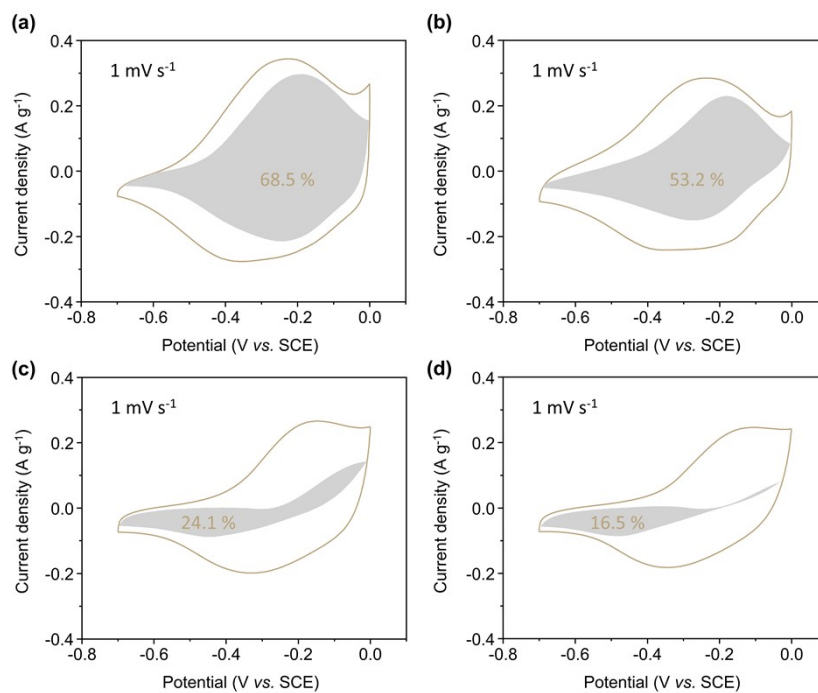

**Fig. S29** Capacitive and diffusion currents contributed to the charge-storage of Zn-CAT electrode at 1 mV s<sup>-1</sup> with different areal densities of 4.9, 24.4, 50.1 and 97.8 mg cm<sup>-2</sup>.

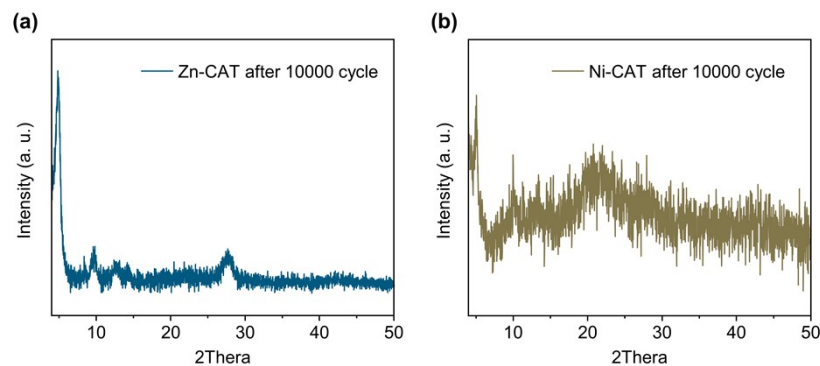

**Fig. S30** PXRD patterns of the Zn- and Ni-CAT electrodes after 10000 cycles. As expected, Zn-CAT electrode still showed good structural stability after 10000 cycles. On the contrary, the XRD peak of Ni-CAT electrode weakened and disappeared after 10000 cycles indicated that the structure of Ni-CAT electrode might be destroyed during the cycling.

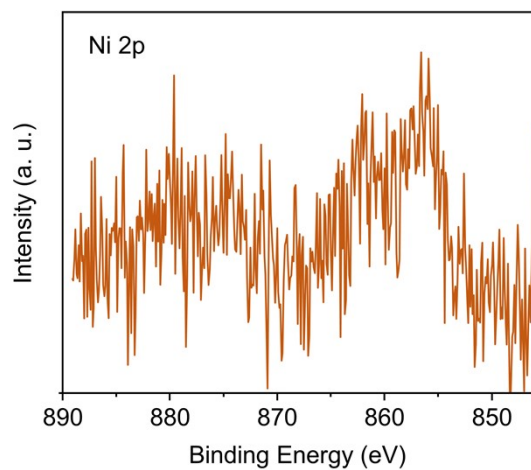

**Fig. S31** Ni 2p region of Ni-CAT after 10000 cycles.

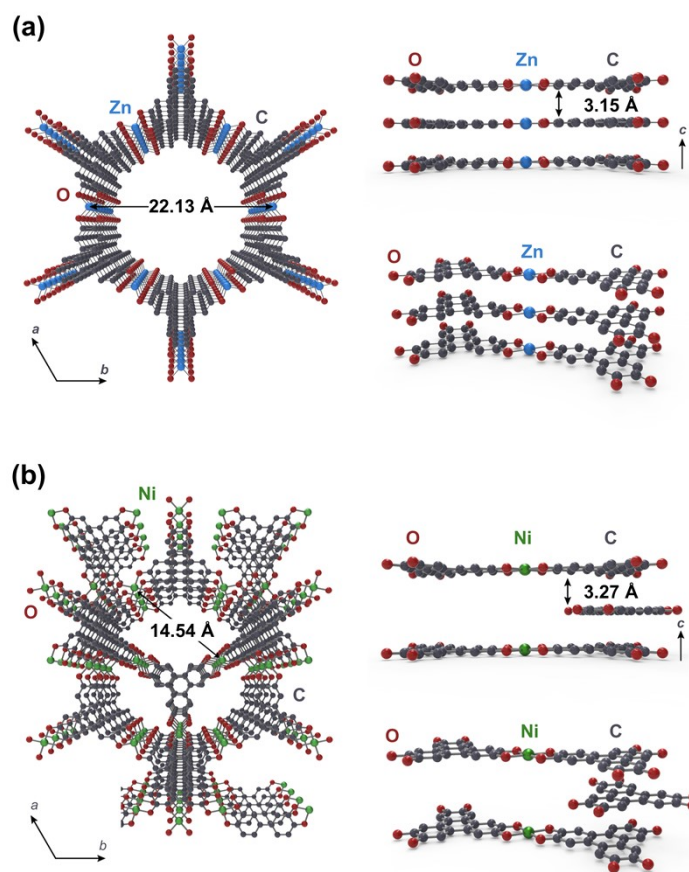

**Fig. S32** Structural analysis of Zn-CAT and Ni-CAT. (a) and (b), A portion of the crystal structure along the c direction and views parallel to the ab plane for Zn-CAT and Ni-CAT. Hydrogen atoms are omitted for clarity.

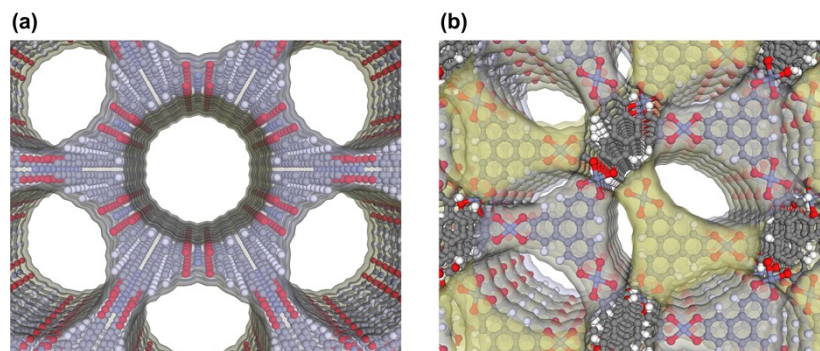

**Fig. S33** Pore model of Zn-CAT and Ni-CAT.

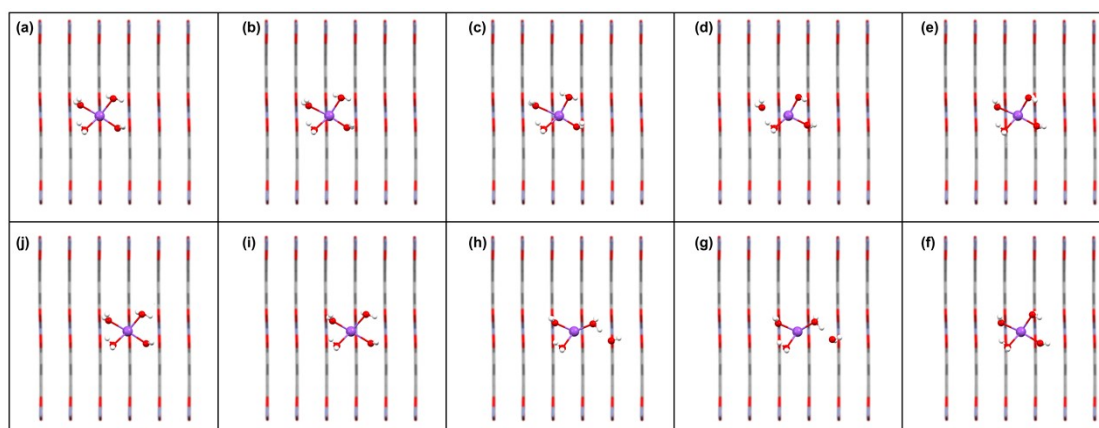

**Fig. S34** Snapshots (a-j in time sequences) of hydrated  $\text{Na}^+$  ions in AA-stacked Zn-CAT nanochannels.

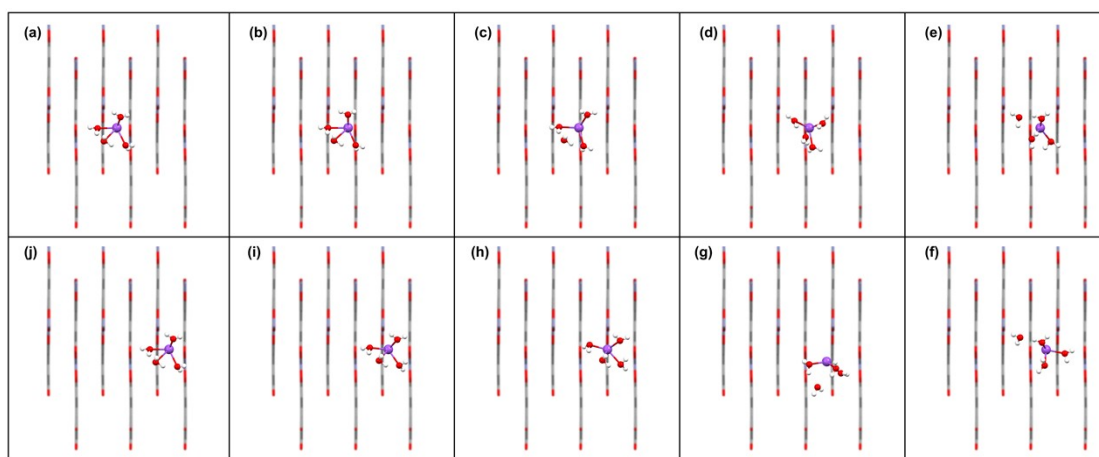

**Fig. S35** Snapshots (a-j in time sequences) of hydrated  $\text{Na}^+$  ions in AB-stacked Ni-CAT nanochannels.

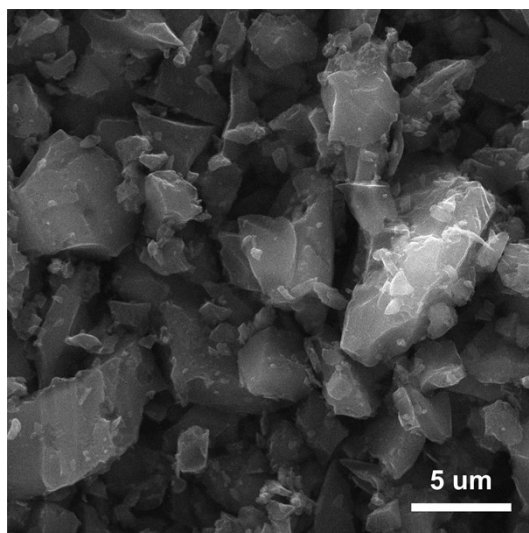

**Fig. S36** SEM images of YP-80F, exhibiting different sizes and irregular shapes.

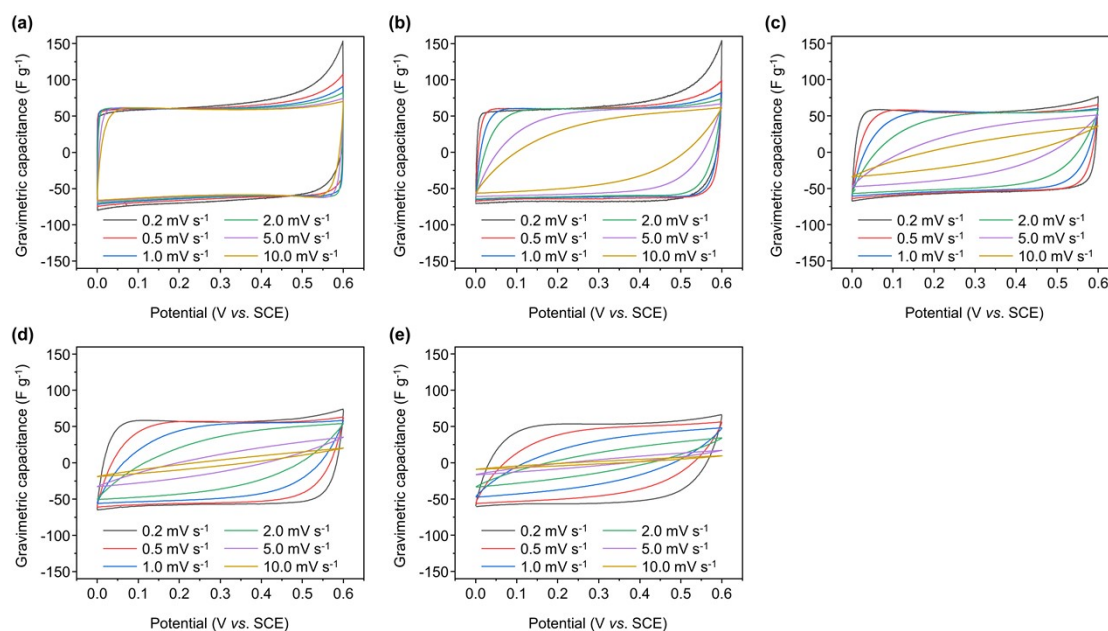

**Fig. S37** Electrochemical performance of YP-80F pellets in 1 M Na<sub>2</sub>SO<sub>4</sub>. Cyclic voltammety profiles collected with different electrode pellets of (a) 5.01 mg cm<sup>-2</sup>, (b) 14.1 mg cm<sup>-2</sup>, (c) 28.4 mg cm<sup>-2</sup>, (d) 57.2 mg cm<sup>-2</sup>, and (e) 112.5 mg cm<sup>-2</sup> at different scan rates from 0.2 to 10 mV s<sup>-1</sup>.



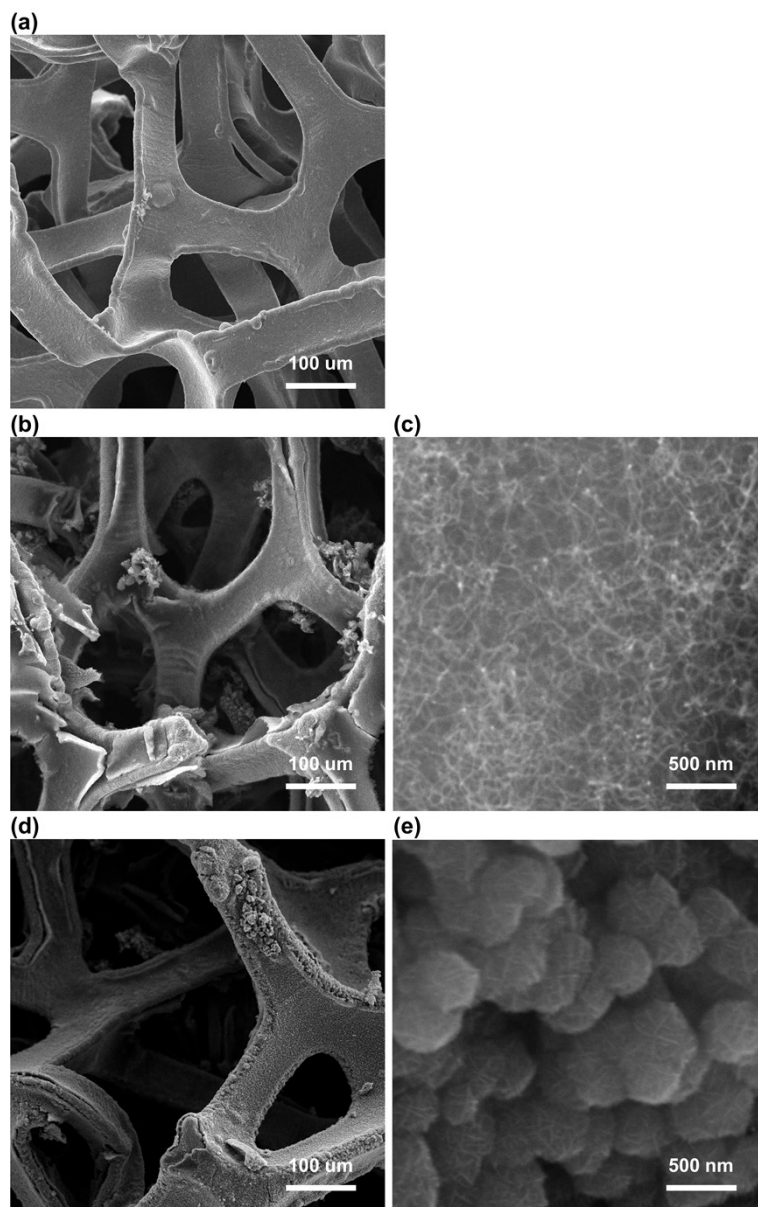

**Fig. S38** SEM images of (a) nickel foam, (b) and (c) CNT@Ni foam, (d) and (e) MnO<sub>2</sub>@CNT@Ni foam.

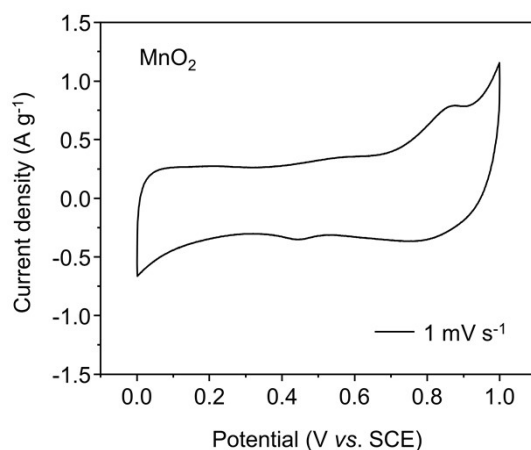

**Fig. S39** Cyclic voltammety profiles of MnO<sub>2</sub> electrode.

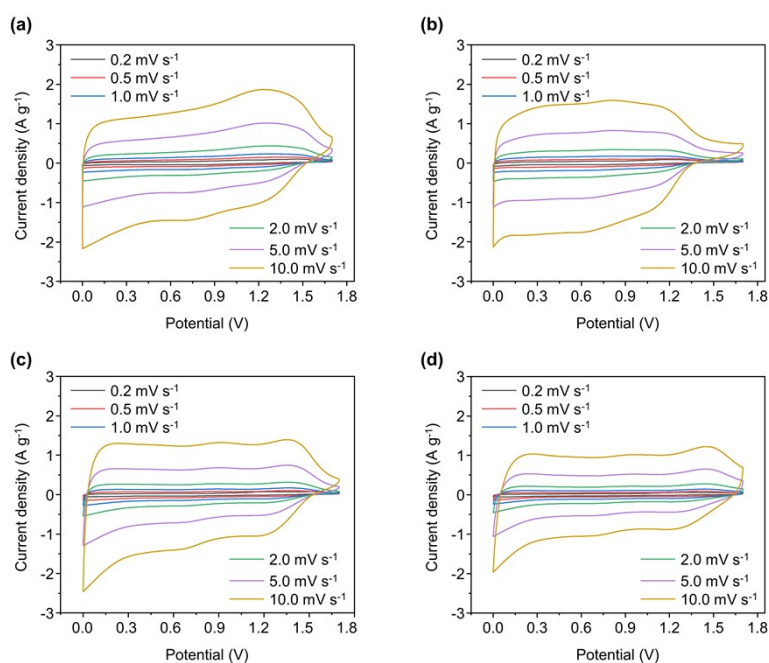

**Fig. S40** Electrochemical performance of Zn-CAT//MnO<sub>2</sub> pellet in 1 M Na<sub>2</sub>SO<sub>4</sub>. Cyclic voltammety profiles collected with different electrode pellets of (a) 5.1 mg cm<sup>-2</sup> (MnO<sub>2</sub>: 3.0 mg cm<sup>-2</sup>), (b) 24.2 mg cm<sup>-2</sup> (MnO<sub>2</sub>: 15.1 mg cm<sup>-2</sup>), (c) 48.6 mg cm<sup>-2</sup> (MnO<sub>2</sub>: 29.3 mg cm<sup>-2</sup>), and (d) 97.8 mg cm<sup>-2</sup> (MnO<sub>2</sub>: 58.2 mg cm<sup>-2</sup>) at different scan rates from 0.2 to 10 mVs<sup>-1</sup>.

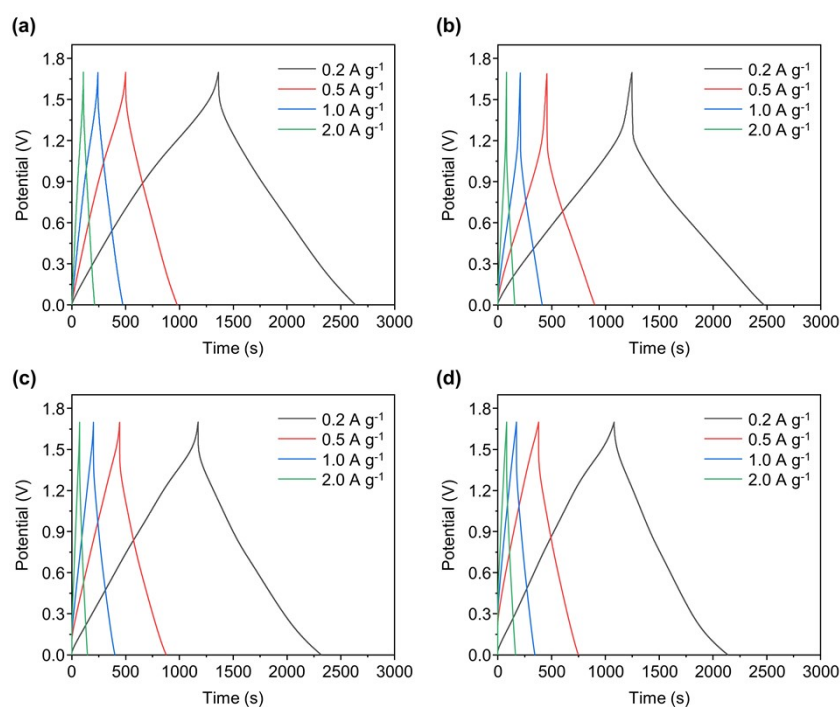

**Fig. S41** Electrochemical performance of Zn-CAT//MnO<sub>2</sub> pellet in 1 M Na<sub>2</sub>SO<sub>4</sub>. Galvanostatic charge-discharge profiles were collected with different electrode pellets of (a) 5.1 mg cm<sup>-2</sup> (MnO<sub>2</sub>: 3.0 mg cm<sup>-2</sup>), (b) 24.2 mg cm<sup>-2</sup> (MnO<sub>2</sub>: 15.1 mg cm<sup>-2</sup>), (c) 48.6 mg cm<sup>-2</sup> (MnO<sub>2</sub>: 29.3 mg cm<sup>-2</sup>), and (d) 97.8 mg cm<sup>-2</sup> (MnO<sub>2</sub>: 58.2 mg cm<sup>-2</sup>) at different current densities from 0.2 to 2.0 A g<sup>-1</sup>.

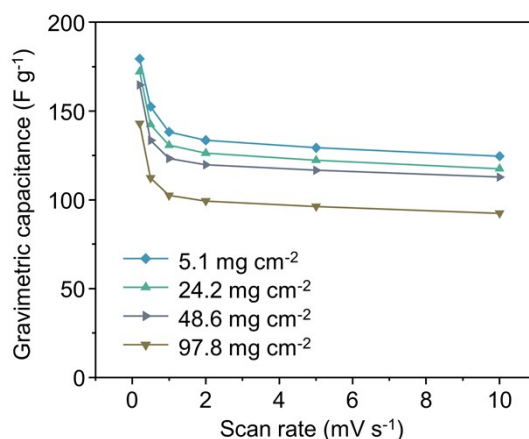

**Fig. S42** Gravimetric rate performance for Zn-CAT//MnO<sub>2</sub> ASC with different areal densities of Zn-CAT (5.1, 24.2, 48.6, and 97.8 mg cm<sup>-2</sup>).

The electrochemical properties of the asymmetric supercapacitors were evaluated in a typical two-electrode configuration with 1 M Na<sub>2</sub>SO<sub>4</sub> electrolyte working in a

negative potential window of 0-1.7 V, and the results were displayed in Fig. S40. Zn-CAT electrodes use the same electrodes as the three-electrode test. Fig. S40 and S41 show representative CV curves and GCD curves for Zn-CAT//MnO<sub>2</sub> ASCs at different scan rates. The Zn-CAT//MnO<sub>2</sub> ASC delivers a mass-specific capacitance of 174 F g<sup>-1</sup> at 0.2 mV s<sup>-1</sup> (Fig. S40). Note that the mass-specific capacitance slightly decreases with increased thickness and mass loading, which is a common-seen phenomenon due to the limited atom economy in the bulk electrode. More impressively, even at a load of 97.8 g cm<sup>-2</sup>, the specific capacitance of the Zn-CAT//MnO<sub>2</sub> ASCs possesses 141 F g<sup>-1</sup>. Moreover, the Zn-CAT//MnO<sub>2</sub> ASCs still maintain a capacitance of 89 F g<sup>-1</sup> when the scan rate increases by 50 times.

## Reference

1. J. Yin, N. Li, M. Liu, Z. Li, X. Wang, M. Cheng, M. Zhong, W. Li, Y. Xu and X. H. Bu, *Adv. Funct. Mater.*, 2023, **33**, 2211950.
2. P. Zhang, M. Wang, Y. Liu, S. Yang, F. Wang, Y. Li, G. Chen, Z. Li, G. Wang, M. Zhu, R. Dong, M. Yu, O. G. Schmidt and X. Feng, *J. Am. Chem. Soc.*, 2021, **143**, 10168-10176.
3. D. Feng, T. Lei, M. R. Lukatskaya, J. Park, Z. Huang, M. Lee, L. Shaw, S. Chen, A. A. Yakovenko, A. Kulkarni, J. Xiao, K. Fredrickson, J. B. Tok, X. Zou, Y. Cui and Z. Bao, *Nat. Energy*, 2018, **3**, 30-36.
4. Q. Jiang, P. Xiong, J. Liu, Z. Xie, Q. Wang, X. Q. Yang, E. Hu, Y. Cao, J. Sun, Y. Xu and L. Chen, *Angew. Chem. Int. Ed.*, 2020, **59**, 5273-5277.
5. B. Wang, J. Li, M. Ye, Y. Zhang, Y. Tang, X. Hu, J. He and C. C. Li, *Adv. Funct. Mater.*, 2022, **32**.
6. J. Liu, Y. Zhou, Z. Xie, Y. Li, Y. Liu, J. Sun, Y. Ma, O. Terasaki and L. Chen, *Angew. Chem. Int. Ed.*, 2019, **59**, 1081-1086.
7. S. Zhang and N. Pan, *Adv. Energy Mater.*, 2014, **5**, 1401401.
